# Supplementary material
Source: Elsevier journal article supplement (https://www.sciencedirect.com/science/article/pii/S0300893214000487)
Supplement: mmc1 [file S0300893214000487:mmc1.pdf]

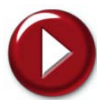

**Material suplementario**

---

**Características demográficas y clínicas de los pacientes con enfermedad coronaria estable: resultados del registro CLARIFY en España**

José L. Zamorano <sup>a</sup>, Xavier García-Moll <sup>b</sup>, Roberto Ferrari <sup>c</sup> y Nicola Greenlaw <sup>d</sup>

<sup>a</sup>*Servicio de Cardiología, Hospital Universitario Ramón y Cajal, Madrid, España*

<sup>b</sup>*Servicio de Cardiología, Hospital de la Santa Creu i Sant Pau, Barcelona, España*

<sup>c</sup>*Servicio de Cardiología, Hospital Universitario de Ferrara, Ferrara, Italia*

<sup>d</sup>*Universidad de Glasgow, Glasgow, Reino Unido*

---

**Investigadores participantes en el registro CLARIFY España:**

M. A. Arnau Vives; F. J. A bardía Oliva; V. Albero Martínez; J. M. Alegret Colomer; E. Alegría Ezquerra; C. A. Almeida Fernández; N. Alvarenga Recalde; A. Alvarez Auñon; P. Alvarez García; C. Amo Fernández; C. Amoros Galito; R. Ancín Viguiristi; J. Antona Makoshi; M. Aparici Feal; A. Ardiaca Capell; J. Arnedillo Pardo; G. Arquero García; V. Arrarte Esteban; M. Baquero Alonso; P. Barahona Pérez; J. L. Bardají Mayor; V. Barriales Alvarez; A. Batalla Celorio; D. Bierge Valero; J. Blanco Castiñeiras; F. Bosa Ojeda; C. Botana Penas; H. Brufau Redondo; J. Bruguera Cortada; J. Cabau Rubies; R. Cabrera Solé; F. Calvo Iglesias; S. Cantabrana Miguel; R. Carrillo Cardoso; M. Casanovas Pié; P. Casas Giménez; E. Castillo Lueña; J. A. Castillo Moreno; M. Castillo Orive; A. Chirivella González; J. M. Chopo Alcubilla; V. Climent Payá ; M. A. Cobos Gil; J. L. Colomer Martín; A. Concepción Clemente; R. Cortés Sánchez; D. Cremer Luengo; S. Darnes Soler; J. de Andrés Novales; R. De Castro Aritmendiz; J. L. Delgado Prieto; J. L. Díaz Díaz; C. Escobar Cervantes; J. Ezcurdia Sasieta; L. Facila Rubio; C. Falces Salvador; P. Federico Zaragoza; R. Fernández Alvarez; F. Fernández de la Cigoña; L. A. Fernández Lázaro; L. C. Fernández Léoz; R. Fernández Mouzo; M. Fernández-Valls Gómez; B. Ferreiro Rodríguez; C. Franco Aranda; J. Freire Corzo; J. Fuertes Alonso; J. Fuertes Beneitez; E. Galve Basilio; C. García García; M. J. García González; S. García Ortego; V. García Saavedra; J. García-Moll Marimón; R. Gascueña Rubia; D. Gentile Lorente; H Gervas Pavón; R. Gilabert Gómez; J. J. Gómez Barrado; J. J. Gómez Doblás; M. J. Gómez Martinez; C. González Juanatey; V. González Toda; M. Gonzalvez Ortega; E. Gordillo Higuero; J. Hernández Afonso; D. Herrera Fernández; E. Homs Espinach; A. Idoate Gastearena; M. Irurita Latasa; R. Izquierdo González; M. Jaquet Herter; M. Lagares Carballo; J. A. Lastra Galán; B. Limeres González; M. A. López Aranda; L. López Barreiro; D. López Gómez; A. López Granados; V. López Mouriño; J. L. López-Sendón; L. Mainar Latorre; E. Marín Araez; F. Marín Ortuño; A.

Martín Santana; J. Martínez Florez; J. Martínez González; J. F. Martínez Rivero; D. Marzal Martín; G. F. Mazzanti Mignaqui; A. Melero Pita; E. Molina Laborda; M<sup>a</sup> A. Montero Gaspar; J. Mora Robles; J. Morales González; J. Moreno Arribas; M<sup>a</sup> T. Moreno Casquete; J. A. Moro López; C. Moya López; N. Murga Eizagahevarría; F. Narro García; J. Navarro Manchón; C. Navas Navas; E. Novo García; J. A. Núñez Gamero; A. Ordóñez España; J. A. Ortiz de Murua López; E. Orts Soler; E. Otero Chulian; L. Pastor Torres; A. J. Paule Sánchez; M. A. Paz Bermejo; G. Peña Pérez; J. Á. Perea Egido; L. Pérez de Isla; S. Pérez Ibiricu; M<sup>a</sup> A. Pérez Martínez; M. Pérez Paredes; E. Peris Domingo; J. Pinar Sopena; C. Pindado Rodríguez; M<sup>a</sup> J. Pinilla Lozano; C. Piñero Ramírez; Y. Porras Ramos; F. Ramos Ariznabarreta; M. Rayo Gutiérrez; J. M. Roca Catalán; A. Rodríguez Almodóvar; J. Rodríguez Collado; A. Rodríguez Fernández; J. A. Rodríguez Fernández; J. A. Rodríguez Hernández; I. Rodríguez Tejero; I. Romeo Castillejo; D. Romero Alvira; J. A. Romero Hinojosa; C. Romero Menor; P. Rossi Sevillano; E. C. Rueda Calle; J. Rueda Soriano; P. Ruiz Pérez; T. Sagastagoitia Gorostiza; I. Sainz Hidalgo; M. Sandin Rollán; S. Santaolalla Rodríguez; E. Santas Olmeda; J. L. Santos Iglesias; M. L. Sanz Rodríguez; I. Segura Laborda; S. Serrano García; B. Sevilla Toral; L. Silva Melchor; E. Simarro Martín-Ambrioso; R. Sola Casado; C. Soriano Navarro; M<sup>a</sup> I. Soto Ruiz; P. Talavera Calle; P. L. Torres Díaz; A. Troncoso Gil; F. Trujillo Berraquero; M. A. Ulecia Martínez; J. Umaran Sánchez; C. Vaticón Herreros; A. Vázquez García; J. L. Vega Barbado; E. Velasco Espejo-Saavedra; T. Vicente Vera; M. Vida Gutiérrez; C. Villar Mariscal; G. Vives Bonato; L. Wu Amen; G. Yanes Bowden; J. C; Yañez Wonenburger; J. L. Zamorano Gómez; J. Zarauza Navarro.
